# Supplementary material
Source: HighWire-hosted journal article supplement (https://erj.ersjournals.com/content/50/4/1700471)
Supplement: inline-supplementary-material-1 [file inline-supplementary-material-1.pdf]

## Appendix 1      Calculation of Number of Symptom Free Days (SFDs)

**Mean number of SFDs derived from question 5 and 7 from the C-ACT for young children.**

- During the last 4 weeks, how many days had your child have daytime asthma symptoms?
- During the last 4 weeks, how many days did your child wake up during the night because of asthma?

**Mean number of SFDs derived from question 2 and 3 from the ACT for older children.**

- During the past 4 weeks, how often have you had shortness of breath?
- During the past 4 weeks, how often did your asthma symptoms wake you up at the night or earlier than usual in the morning?

| Young children (6 - 11 years) |                           |                |
|-------------------------------|---------------------------|----------------|
| C-ACT score                   | Days with asthma symptoms | Number of SFDs |
| 5                             | 0                         | 30             |
| 4                             | 1-3                       | 28             |
| 3                             | 4-10                      | 23             |
| 2                             | 11-18                     | 15.5           |
| 1                             | 19-24                     | 8.5            |
| 0                             | 30                        | 0              |

| Older children (12 - 16 years) |                           |                |
|--------------------------------|---------------------------|----------------|
| C-ACT score                    | Days with asthma symptoms | Number of SFDs |
| 5                              | 0                         | 30             |
| 4                              | 1-2                       | 28.5           |
| 3                              | 4                         | 26             |
| 2                              | 8-12                      | 20             |
| 1                              | >16                       | <14            |
